# Supplementary material
Source: Springer Nature journal article supplement (https://www.springermedizin.de/resource/supplementary/12865_2009_248_MOESM6_ESM.pdf/9427594)

**A**

2338  
GGA GAC AGG WT  
G D R

GGA GCC AGG D2338A kd  
G A R

**B**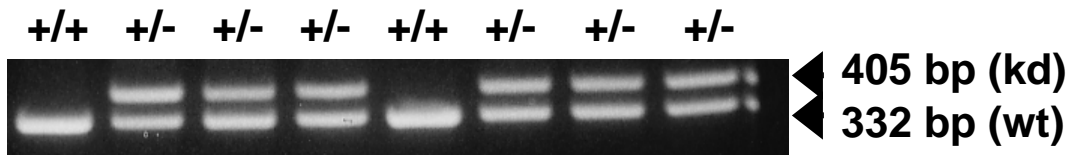

Supplement: MOESM6 [file 9427594]
